# Supplementary material
Source: MDPI journal article supplement (https://www.mdpi.com/2032-6653/14/12/344)
Supplement: s1 [file s1]

### supplementary file

The core source program of the positioning model:

Software: Matlab

% Algorithm 1: Core Source Program of the Positioning Model

% Dynamic demonstration of path planning for automated parking.

function AutomatedParkingDemo()

% Initialize MATLAB environment

clc;

clear;

close all;

% Parking area limits

UpLimit = 8.1; % Upper boundary vertical coordinate

RightLimit = 15; % Right border of horizontal coordinate

% Parking information point C

FrontP = [5.1, 2.6];

% Parking spots

O3 = [0.5, 1];

% Initial Point

InitePlot = [6, 4];

% Car specifications

CarLong = 4.9; % Car Captain

CarWidth = 1.8; % Car width

RMin = 4.99; % Minimum turning radius

PlotVec = 0.01; % Animation speed

FitModel = 0; % Fitting form, 1-bit higher polynomial, other numbers are Fourier series

fitting

% Plot the limited parking area

figure(1)

hold on

plot([0, RightLimit], [UpLimit, UpLimit], 'LineWidth', 2, 'Color', [0 0 0]);

plot([0, FrontP(1)], [0, 0], 'LineWidth', 2, 'Color', [0 0 0]);

plot([FrontP(1), FrontP(1)], [0, FrontP(2)], 'LineWidth', 2, 'Color', [0 0 0]);

plot([FrontP(1), RightLimit], [FrontP(2), FrontP(2)], 'LineWidth', 2, 'Color', [0 0 0]);

axis([0 RightLimit 0 UpLimit], 'equal');

```

% Parameters
x = InitePlot(1);
y = InitePlot(2);
CO = [x, y]; % Vehicle rear axle center point coordinates

% Rest of the code...

end

% Algorithm 2: Car Parking Information and Route Planning

% Car parking information
CarLongine(1,:) = [x, x, y - CarWidth/2, y + CarWidth/2];
CarLongine(2,:) = [x, x + CarLong, y + CarWidth/2, y + CarWidth/2];
CarLongine(3,:) = [x + CarLong, x + CarLong, y + CarWidth/2, y - CarWidth/2];
CarLongine(4,:) = [x + CarLong, x, y - CarWidth/2, y - CarWidth/2];

% Initialization
figure(1);
for i = 1:4
    plot([CarLongine(i,1), CarLongine(i,2)], [CarLongine(i,3), CarLongine(i,4)], 'Color', [0 0
0]);
end

% Description of the starting point
% plot(x, y, 'ro');

%% Route Planning

% Your existing code for route planning here...

% Collision judgment
DCo1 = sqrt(CarLong^2 + (CarWidth/2 + DMiddle)^2);
ThetaCo1 = atan2((CarWidth/2 + DMiddle), CarLong);
if ThetaCo1 < Alpha
    % Collision judgment logic...
end

DCo2 = sqrt(CarLong^2 + (CarWidth/2 + RMin)^2);
ThetaCo2 = atan2((CarWidth/2 + RMin), CarLong);
if ThetaCo2 + Alpha >= pi/2
    % Collision judgment logic...

```

```

end

ErrX = 0;
ErrY = 0;

%% Discrete data construction

% Arc Information
Cir1R = DMiddle;
Cir1O = [x, YMiddle];
Cir2R = RMin;
Cir2O = [O3(1), O3(2) + RMin];

% Constructing sequences
AlphaArr = linspace(0, Alpha, 50);
AlphaArr = AlphaArr';
Cir1Data = [x - DMiddle.*sin(AlphaArr), YMiddle + DMiddle.*cos(AlphaArr), AlphaArr];
AlphaArr = linspace(Alpha, 0, 50);
AlphaArr = AlphaArr';
Cir2Data = [Cir2O(1) + RMin.*sin(AlphaArr), Cir2O(2) - RMin.*cos(AlphaArr), AlphaArr];
CirData = [Cir1Data; Cir2Data];

%% Graphical interface

for item = 1:length(CirData)
    CO = [CirData(item, 1) + ErrX, CirData(item, 2) + ErrY];
    CarLongine = CarP(CarLong, CarWidth, CO);
    for i = 1:4
        bCarLongine = RotTheta(CarLongine(i,:), CirData(item, 3), CO(1), CO(2));
        plot([bCarLongine(1), bCarLongine(2)], [bCarLongine(3), bCarLongine(4)], 'Color',
[0 0 0]);
        % Description of the current point
        % plot(x, y, 'r');
    end
    pause(0.02)
end

% End

% Algorithm 3: Automatic Parking Assistance System
clc
close all
clearvars
%% Declaring global variables

```

```

global wl;
global ww;
global D;
global L;
global WSeta;
    wl=7;
    ww=2;
    A=15;
    L=20;
    D=5;
    F=8;
    B=L+D+F;
    %% Rectangular coordinates of the parked vehicle 1
    ParkedCar1x1=0;
    ParkedCar1y1=40;
    ParkedCar1x2=ParkedCar1x1;
    ParkedCar1y2=75;
    ParkedCar1x3=15;
    ParkedCar1y3=ParkedCar1y2;
    ParkedCar1x4=ParkedCar1x3;
    ParkedCar1y4=ParkedCar1y1;
    %% Rectangular coordinates of parked vehicle 2
    ParkedCar2x1=40;
    ParkedCar2y1=40;
    ParkedCar2x2=ParkedCar2x1;
    ParkedCar2y2=75;
    ParkedCar2x3=55;
    ParkedCar2y3=ParkedCar2y2;
    ParkedCar2x4=ParkedCar2x3;
    ParkedCar2y4=ParkedCar2y1;
    %% Rectangular coordinates of parked vehicle 3
    ParkedCar3x1=-40;
    ParkedCar3y1=40;
    ParkedCar3x2=ParkedCar3x1;
    ParkedCar3y2=75;
    ParkedCar3x3=-25;
    ParkedCar3y3=ParkedCar3y2;
    ParkedCar3x4=ParkedCar3x3;
    ParkedCar3y4=ParkedCar3y1;
    %% Adjustment parameters
    WSeta=50;
    WSeta=(WSeta/180)*pi; % Curvature
    xi=ParkedCar1x2-3;
    yi=ParkedCar1y2+25;

```

```

f1e=40;
%% Simulation device
axis([-60 100 -20 100],'equal');
t=0:0.01:pi;
seta=2*t;
Xc=xi-(L/tan(WSeta));
Yc=yi+D;
Rbl=sqrt(D^2+(L/tan(WSeta))^2);
phi=atan(D/(L/tan(WSeta)));
%% Initialization of the scene begins
i=1;
x=Xc+Rbl*cos(seta(i)+phi);
y=Yc-Rbl*sin(seta(i)+phi);
patch([ParkedCar2x1          ParkedCar2x2          ParkedCar2x3
ParkedCar2x4],[ParkedCar2y1 ParkedCar2y2 ParkedCar2y3 ParkedCar2y4],[1 0 0]);
patch([ParkedCar1x1          ParkedCar1x2          ParkedCar1x3
ParkedCar1x4],[ParkedCar1y1 ParkedCar1y2 ParkedCar1y3 ParkedCar1y4],[0 0 1]);
patch([ParkedCar3x1          ParkedCar3x2          ParkedCar3x3
ParkedCar3x4],[ParkedCar3y1 ParkedCar3y2 ParkedCar3y3 ParkedCar3y4],[1 0 1]);
title("Automatic parking Assistance System");
text(ParkedCar1x2,ParkedCar1y2+5,"Car 1");
text(ParkedCar2x2,ParkedCar2y2+5,"Car 2");
text(ParkedCar3x2,ParkedCar3y2+5,"Car 3");
text(ParkedCar2x2,ParkedCar2y2+40,"Parking Lot",'Color','red','FontSize',16);
Turn1(x,y,A,B,seta(i));
pause(4);
%% Parking simulation scenario
for i=2:f1e
x=Xc+Rbl*cos(seta(i)+phi);
y=Yc-Rbl*sin(seta(i)+phi);
cla;
patch([ParkedCar2x1          ParkedCar2x2          ParkedCar2x3
ParkedCar2x4],[ParkedCar2y1 ParkedCar2y2 ParkedCar2y3 ParkedCar2y4],[1 0 0]);
patch([ParkedCar1x1          ParkedCar1x2          ParkedCar1x3
ParkedCar1x4],[ParkedCar1y1 ParkedCar1y2 ParkedCar1y3 ParkedCar1y4],[0 0 1]);
patch([ParkedCar3x1          ParkedCar3x2          ParkedCar3x3
ParkedCar3x4],[ParkedCar3y1 ParkedCar3y2 ParkedCar3y3 ParkedCar3y4],[1 0 1]);
text(ParkedCar1x2,ParkedCar1y2+5,"Car 1");
text(ParkedCar2x2,ParkedCar2y2+5,"Car 2");
text(ParkedCar3x2,ParkedCar3y2+5,"Car 3");
text(ParkedCar2x2,ParkedCar2y2+40,"Parking Lot",'Color','red','FontSize',16);
Turn1(x,y,A,B,seta(i));
pause(.05);
end

```

```

        xi=x+A*cos(seta(f1e));
        yi=y-A*sin(seta(f1e));
        Xc=xi+Rbl*cos(seta(f1e));
        Yc=yi-Rbl*sin(seta(f1e));
        pause(1);
        for i=f1e:-1:1
            x=Xc-Rbl*cos(seta(i));
            y=Yc+Rbl*sin(seta(i));
            cla;
            patch([ParkedCar2x1          ParkedCar2x2          ParkedCar2x3
ParkedCar2x4],[ParkedCar2y1 ParkedCar2y2 ParkedCar2y3 ParkedCar2y4],[1 0 0]);
            patch([ParkedCar1x1          ParkedCar1x2          ParkedCar1x3
ParkedCar1x4],[ParkedCar1y1 ParkedCar1y2 ParkedCar1y3 ParkedCar1y4],[0 0 1]);
            patch([ParkedCar3x1          ParkedCar3x2          ParkedCar3x3
ParkedCar3x4],[ParkedCar3y1 ParkedCar3y2 ParkedCar3y3 ParkedCar3y4],[1 0 1]);
            text(ParkedCar1x2,ParkedCar1y2+5,"Car 1");
            text(ParkedCar2x2,ParkedCar2y2+5,"Car 2");
            text(ParkedCar3x2,ParkedCar3y2+5,"Car 3");
            text(ParkedCar2x2,ParkedCar2y2+40,"Parking Lot",'Color','red','FontSize',16);
            [xa1, xb1, xb2, xa2, ya1, yb1, yb2, ya2]=Turn2(x,y,A,B,seta(i));
            pause(.05);
        end
        pause(1);
        for i=1:50
            ya1=ya1-.5;
            yb1=yb1-.5;
            ya2=ya2-.5;
            yb2=yb2-.5;
            cla;
            patch([ParkedCar2x1  ParkedCar2x2  ParkedCar2x3  ParkedCar2x4],[ParkedCar2y1
ParkedCar2y2 ParkedCar2y3 ParkedCar2y4],[1 0 0]);
            patch([ParkedCar1x1  ParkedCar1x2  ParkedCar1x3  ParkedCar1x4],[ParkedCar1y1
ParkedCar1y2 ParkedCar1y3 ParkedCar1y4],[0 0 1]);
            patch([ParkedCar3x1  ParkedCar3x2  ParkedCar3x3  ParkedCar3x4],[ParkedCar3y1
ParkedCar3y2 ParkedCar3y3 ParkedCar3y4],[1 0 1]);
            patch([xa1 xb1 xb2 xa2],[ya1 yb1 yb2 ya2],[0 1 0]);
            text(ParkedCar1x2,ParkedCar1y2+5,"Car 1");
            text(ParkedCar2x2,ParkedCar2y2+5,"Car 2");
            text(ParkedCar3x2,ParkedCar3y2+5,"Car 3");
            text(ParkedCar2x2,ParkedCar2y2+40,"Parking Lot",'Color','red','FontSize',16);
            ya11=ya1+(D-wl/2);
            yb11=yb1+wl;
            ya21=ya2+(D-wl/2);
            yb21=yb2+wl;

```

```

xa11=xa2+(ww/2);
xb11=xa2+(ww/2);
xa21=xa2-(ww/2);
xb21=xa2-(ww/2);
patch([xa11 xb11 xb21 xa21],[ya11 yb11 yb21 ya21],[0 0 0]);
xa22=xa1-(ww/2);
xb22=xa1-(ww/2);
xa12=xa1+(ww/2);
xb12=xa1+(ww/2);
patch([xa12 xb12 xb22 xa22],[ya11 yb11 yb21 ya21],[0 0 0]);
ya13=ya11+L;
yb13=yb11+L;
patch([xa11 xb11 xb21 xa21],[ya13 yb13 yb13 ya13],[0 0 0]);
patch([xa12 xb12 xb22 xa22],[ya13 yb13 yb13 ya13],[0 0 0]);
pause(.02);
end

disp("This car is parked between the purple and blue cars because this is the shortest
distance from the car's initial position to the available parking space")

```

% Algorithm 4: MATLAB GUI Initialization

function varargout = jieshu(varargin)

% JIESHU M-file for jieshu.fig

% JIESHU, by itself, creates a new JIESHU or raises the existing  
 singleton\*.

% H = JIESHU returns the handle to a new JIESHU or the handle to  
 the existing singleton\*.

% JIESHU('CALLBACK',hObject,eventData,handles,...) calls the local  
 function named CALLBACK in JIESHU.M with the given input arguments.

% JIESHU('Property','Value',...) creates a new JIESHU or raises the  
 existing singleton\*. Starting from the left, property value pairs are  
 applied to the GUI before jieshu\_OpeningFcn gets called. An

% unrecognized property name or invalid value makes property application  
 stop. All inputs are passed to jieshu\_OpeningFcn via varargin.

% \*See GUI Options on GUIDE's Tools menu. Choose "GUI allows only one  
 instance to run (singleton)".

% See also: GUIDE, GUIDATA, GUIHANDLES

% Edit the above text to modify the response to help jieshu

% Last Modified by GUIDE v2.5 07-Dec-2010 22:40:03

% Begin initialization code - DO NOT EDIT

gui\_Singleton = 1;

```

gui_State = struct('gui_Name',       mfilename, ...
                  'gui_Singleton',   gui_Singleton, ...
                  'gui_OpeningFcn', @jieshu_OpeningFcn, ...
                  'gui_OutputFcn',  @jieshu_OutputFcn, ...

```

```

        'gui_LayoutFcn', [] , ...
        'gui_Callback', []);
if nargin && ischar(varargin{1})
    gui_State.gui_Callback = str2func(varargin{1});
end
if nargin
    [varargout{1:nargout}] = gui_mainfcn(gui_State, varargin{:});
else
    gui_mainfcn(gui_State, varargin{:});
end
% End initialization code - DO NOT EDIT

% --- Executes just before jieshu is made visible.
function jieshu_OpeningFcn(hObject, eventdata, handles, varargin)
% This function has no output args, see OutputFcn.
% hObject    handle to figure
% eventdata  reserved - to be defined in a future version of MATLAB
% handles     structure with handles and user data (see GUIDATA)
% varargin    command line arguments to jieshu (see VARARGIN)
% Choose default command line output for jieshu
handles.output = hObject;
% Update handles structure
guidata(hObject, handles);
global qian
global rate
set(handles.abc,'String',num2str(rate));
set(handles.bbb,'String',num2str(qian));
% UIWAIT makes jieshu wait for user response (see UIRESUME)
% uiwait(handles.figure1);
% --- Outputs from this function are returned to the command line.
function varargout = jieshu_OutputFcn(hObject, eventdata, handles)
% varargout  cell array for returning output args (see VARARGOUT);
% hObject    handle to figure
% eventdata  reserved - to be defined in a future version of MATLAB
% handles     structure with handles and user data (see GUIDATA)
% Get default command line output from handles structure
varargout{1} = handles.output;

function edit2_Callback(hObject, eventdata, handles)
% hObject    handle to edit2 (see GCBO)
% eventdata  reserved - to be defined in a future version of MATLAB
% handles     structure with handles and user data (see GUIDATA)
% Hints: get(hObject,'String') returns contents of edit2 as text
%          str2double(get(hObject,'String')) returns contents of edit2 as a double

```



```

% --- Executes during object creation, after setting all properties.
function edit2_CreateFcn(hObject, eventdata, handles)
% hObject    handle to edit2 (see GCBO)
% eventdata  reserved - to be defined in a future version of MATLAB
% handles    empty - handles not created until after all CreateFcns called
% Hint: edit controls usually have a white background on Windows.
%           See ISPC and COMPUTER.
if ispc && isequal(get(hObject,'BackgroundColor'), get(0,'defaultUicontrolBackgroundColor'))
    set(hObject,'BackgroundColor','white');
end

```

```

% Algorithm 5: CreateFcn for edit2 in the GUI
% --- Executes during object creation, after setting all properties. function
edit2_CreateFcn(hObject, eventdata, handles)
% hObject    handle to edit3 (see GCBO)
% eventdata  reserved - to be defined in a future version of MATLAB
% handles    structure with handles and user data (see GUIDATA)
% Hints: get(hObject,'String') returns contents of edit3 as text
%        str2double(get(hObject,'String')) returns contents of edit3 as a double
% --- Executes during object creation, after setting all properties.
function edit3_CreateFcn(hObject, eventdata, handles)
% hObject    handle to edit3 (see GCBO)
% eventdata  reserved - to be defined in a future version of MATLAB
% handles    empty - handles not created until after all CreateFcns called
% Hint: edit controls usually have a white background on Windows.
%           See ISPC and COMPUTER.
if ispc && isequal(get(hObject,'BackgroundColor'), get(0,'defaultUicontrolBackgroundColor'))
    set(hObject,'BackgroundColor','white');
End

```

```

% Algorithm 6: Callbacks for pushbutton1, pushbutton2, and CreateFcn for bbb
% --- Executes on button press in pushbutton1.
function pushbutton1_Callback(hObject, eventdata, handles)
close all;
openfig('jiemian1.fig')
% hObject    handle to pushbutton1 (see GCBO)
% eventdata  reserved - to be defined in a future version of MATLAB
% handles    structure with handles and user data (see GUIDATA)
% --- Executes on button press in pushbutton2.
function pushbutton2_Callback(hObject, eventdata, handles)
close all
% hObject    handle to pushbutton2 (see GCBO)
% eventdata  reserved - to be defined in a future version of MATLAB

```

```
% handles      structure with handles and user data (see GUIDATA)
% --- Executes during object creation, after setting all properties.
function bbb_CreateFcn(hObject, eventdata, handles)
% hObject      handle to bbb (see GCBO)
% eventdata    reserved - to be defined in a future version of MATLAB
% handles      empty - handles not created until after all CreateFcns called
plot3(a(:,1),a(:,2),a(:,3),'ro-');
% End of Algorithm 6
```
